# Supplementary material for: The Amino Acid Arginine 210 of the Response Regulator HrpG of Xanthomonas citri subsp. citri Is Required for HrpG Function in Virulence
Source: PubMed Central journal article supplement (PMC4427454; doi:10.1371/journal.pone.0125516), 2015-05-11
Supplement: pone.0125516.s001.pdf [file pone.0125516.s001.pdf]

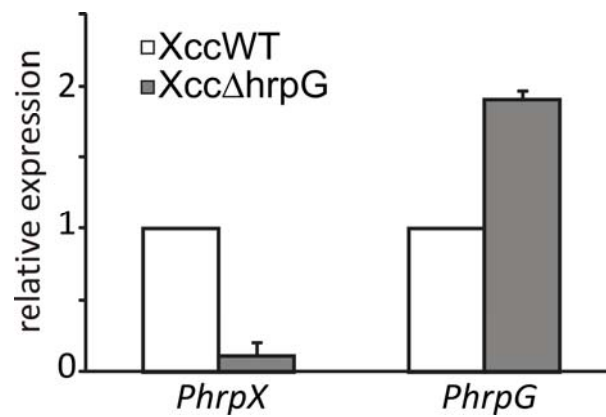

**S1 Figure. Relative expression of *hrpX* and *hrpG* in Xcc wild type and the  $\Delta$ hrpG mutant.** Transcriptional fusions of the promoters  $P_{hrpX}$  and  $P_{hrpG}$  to GFP reporter gene were assayed. The plasmids pPROBE-NT-*PhrpX* and pPROBE-NT-*PhrpG* were introduced into Xcc and  $\Delta$ hrpG and strains were grown in XVM2. Values of fluorescence obtained for the mutant were expressed relative to the values obtained for the wild type Xcc. The experiment was repeated 3 times with three technical replicates each. Error bars indicate the standard deviation.
