# Supplementary material for: The Amino Acid Arginine 210 of the Response Regulator HrpG of Xanthomonas citri subsp. citri Is Required for HrpG Function in Virulence
Source: PubMed Central journal article supplement (PMC4427454; doi:10.1371/journal.pone.0125516), 2015-05-11
Supplement: pone.0125516.s002.pdf [file pone.0125516.s002.pdf]

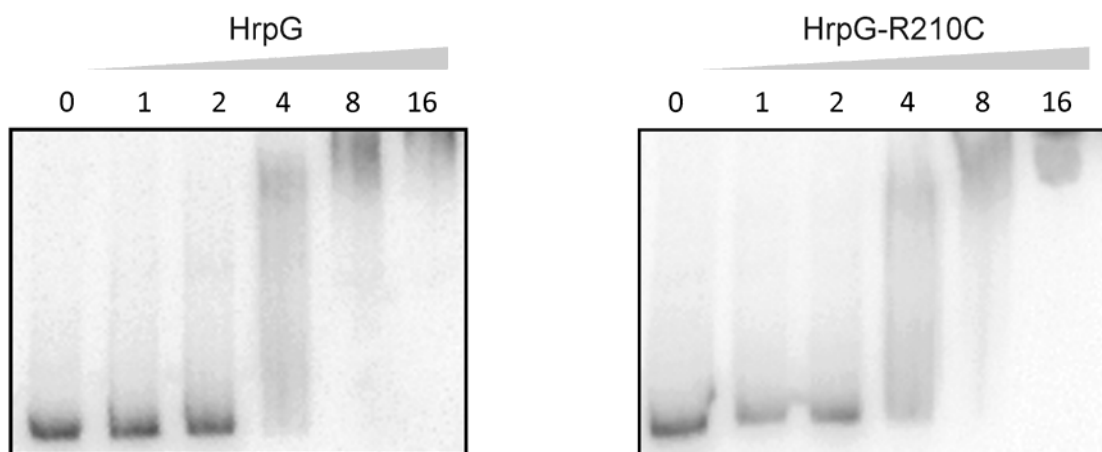

**S2 Figure. HrpG wild type and the R210C mutant bind similarly to *hrpG* promoter.** Electrophoretic mobility shift assay of  $^{32}\text{P}$ -labeled *hrpG* promoter and purified HrpG and HrpG-R210C. Numbers in the top of the lanes indicate pmoles of protein added to the assay.
