# Supplementary material for: The Amino Acid Arginine 210 of the Response Regulator HrpG of Xanthomonas citri subsp. citri Is Required for HrpG Function in Virulence
Source: PubMed Central journal article supplement (PMC4427454; doi:10.1371/journal.pone.0125516), 2015-05-11
Supplement: pone.0125516.s003.pdf [file pone.0125516.s003.pdf]

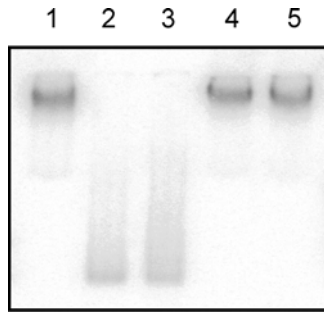

**S3 Figure. The  $\alpha$ CTD fragment of RNA polymerase does not cause a supershift in the HrpG-P<sub>hrpX</sub> complex.** Supershift assay using HrpG and HrpG-R210C pre-incubated with the  $\alpha$ CTD fragment of RNA polymerase and then with the P<sub>hrpX</sub> promoter region. Lane 1 shows the binding of 16 pmoles of of HrpG to P<sub>hrpX</sub> as control. Lanes 2 and 3: P<sub>hrpX</sub> was incubated with 50 and 100 pmoles of  $\alpha$ CTD, respectively and lanes 4 and 5 shows the pre-incubation of HrpG (lane 4) and HrpG-R210C (lane 5) with  $\alpha$ CTD (50 pmoles) and then incubation with P<sub>hrpX</sub>.
