# Supplementary material for: The Amino Acid Arginine 210 of the Response Regulator HrpG of Xanthomonas citri subsp. citri Is Required for HrpG Function in Virulence
Source: PubMed Central journal article supplement (PMC4427454; doi:10.1371/journal.pone.0125516), 2015-05-11
Supplement: pone.0125516.s004.pdf [file pone.0125516.s004.pdf]

**S1 Table. List of all the oligonucleotides used in this study.**

| <b>Name</b>     | <b>Oligonucleotide sequence</b>                                 | <b>Use</b>                                    |
|-----------------|-----------------------------------------------------------------|-----------------------------------------------|
| 5' up EcoRI     | GATCGAATTC <del>CCGGTCTCTCTCTTTGGG</del>                        | Mutant construction                           |
| 5' down SmaI    | AGCT <del>CCC<del>GGG</del>GAGTGGTCGTTCA<del>TTTAGG</del></del> | Mutant construction                           |
| 3' up SalI      | GCATG <del>T<del>CG</del>ACCGATA<del>CGGAGGCAACGAC</del></del>  | Mutant construction                           |
| 3' down HindIII | TAGCA <del>A<del>GCTT</del>CAGACACCG<del>CTCACTGCC</del></del>  | Mutant construction                           |
| HrpGKpnIup      | GACT <del>GGT<del>ACCGTGCATGAACGACCACTCTCCC</del></del>         | Mutant complementation                        |
| HrpGBamHIup     | GACT <del>GGATCCATGAACGACCACTCTCCC</del>                        | Protein expression                            |
| HrpGXhoI down   | GCATCT <del>CGAGATCAAACACCCTTCGCTTTAA</del>                     | Mutant complementation/<br>Protein expression |
| HrpX-RT up      | CGATGATGAGGTCAGTTTGT                                            | qRT-PCR                                       |
| HrpX-RT down    | ACTGCGCAAAGCAATTCAAC                                            | qRT-PCR                                       |
| HrcC-RT up      | TTCGTCTGGTACTACGATGG                                            | qRT-PCR                                       |
| HrcC-RT down    | CCGAAACGGTATCCACATAC                                            | qRT-PCR                                       |
| hrpB2-RT up     | AACCAAGCGCTTGTGAATCG                                            | qRT-PCR                                       |
| hrpB2-RT down   | CTATTGGTTCTTGACCAGTG                                            | qRT-PCR                                       |
| RpoB up         | ACGAGAAGGAATTCTGAAGCA                                           | qRT-PCR                                       |
| RpoB down       | GTTGGAGACCACACCCTTGT                                            | qRT-PCR                                       |
| CsLOB1 up       | TCCACCAACCGAACCATACA                                            | qRT-PCR                                       |
| CsLOB1 down     | GGCACTTGCTTCATAGACCAT                                           | qRT-PCR                                       |
| Actin up        | TCAATTGGATACTTCAAAGTCAAAT                                       | qRT-PCR                                       |
| Actin down      | ACGTGAATTCTAGTGTTTCGATAAGT                                      | qRT-PCR                                       |
| phrpX up        | GCATAAGCTTCAGTGATCTGCCCTCGTGTC                                  | Promoter cloning<br>In vitro transcription    |
| phrpX down      | GCATCTGCAGGATCGCTGCAAAGTAAGTGG                                  | Promoter cloning                              |
| phrpG up        | GCATAAGCTTTGCCGACCTATTCCAGTCAC                                  | Promoter cloning                              |
| phrpG down      | GCATCTGCAGCGTCAACAGGAACACCGATC                                  | Promoter cloning                              |
| phrpX-ivt down  | CAGCGCCCTGTCCGTCGCG                                             | In vitro transcription                        |
